# Supplementary material for: Evolutionary novelty in gravity sensing through horizontal gene transfer and high-order protein assembly
Source: PLoS Biol. 2018 Apr 24;16(4):e2004920. doi: 10.1371/journal.pbio.2004920 (PMC5915273; doi:10.1371/journal.pbio.2004920)
Supplement: S3 Table — NCBI, National Center for Biotechnology Information; OCTIN, octahedral crystal matrix protein. (XLSX) [file pbio.2004920.s017.xlsx]

## Sheet: S3 Table
	Species	Accession		Species	Accession
	Mucor circinelloides	EPB92165.1		Sphingomonas sp. ERG5	WP_052215643.1
	Terracidiphilus gabretensis	WP_058186889.1		Pelomonas sp. Root1217	WP_057297178.1
	Jiangella gansuensis	WP_026875337.1		Stenotrophomonas humi	KRG63270.1
	Agreia sp. Leaf283	WP_055927932.1		Stenotrophomonas acidaminiphila	WP_054668709.1
	Kribbella catacumbae	WP_020391299.1		Stenotrophomonas nitritireducens	WP_057505020.1
	Agreia sp. Leaf244	WP_055945630.1		Stenotrophomonas terrae	KRG66630.1
	Amycolatopsis nigrescens	WP_020666015.1		Stenotrophomonas sp. Leaf70	WP_055767446.1
	Hymenobacter sp. PAMC 26628	WP_068237622.1		Stenotrophomonas maltophilia	KRG44579.1
	Microbacterium arborescens	WP_064955308.1		Emiliania huxleyi CCMP1516	XP_005793836.1
	Microbacterium sp. TS-1	WP_023953494.1		Sphingomonas koreensis	WP_066580072.1
	Microbacterium paludicola	WP_071918859.1		Aureococcus anophagefferens	XP_009035726.1
	Micromonospora sp. CB01531	WP_073834508.1		Terriglobus saanensis	WP_013568793.1
	Granulicella mallensis	WP_014266294.1		Sphingomonas sp. ABOJV	WP_075151731.1
	Hamadaea tsunoensis	WP_027341245.1		Albugo candida	CCI10646.1
	Jiangella alba	WP_069113217.1		Sphingomonas mali	WP_066822048.1
	Jiangella alkaliphila	WP_046772919.1		Sphingomonas pruni	WP_066590393.1
	Jiangella muralis	WP_053205108.1		Stenotrophomonas ginsengisoli	WP_057638545.1
	Pelagibacterium halotolerans	WP_014129354.1		Sphingomonas asaccharolytica	WP_066804376.1
	Nocardioides sp. Iso805N	WP_017935148.1		Phycomyces blakesleeanus	XP_018295118.1
	Algoriphagus sp. M8-2	WP_067549413.1		Asticcacaulis sp. AC466	WP_031238302.1
	Flavobacterium granuli	WP_072939843.1		Bacteroides stercorirosoris	WP_083595447.1
	Flavisolibacter ginsengisoli	WP_072833204.1		Fimbriimonas ginsengisoli	WP_025225477.1
	Rudaea cellulosilytica	WP_018972250.1		Deinococcus apachensis	WP_019588531.1
	Mariniradius saccharolyticus	WP_008628468.1		Limnochorda pilosa	WP_068137954.1
	Emticicia oligotrophica	WP_015028852.1		Leifsonia sp. Root227	KRC47462.1
	Emticicia sp. MM	WP_064197188.1		Stackebrandtia nassauensis	WP_013017557.1
	Bacteroidales bacterium 6E	GAP68824.1		Amycolatopsis thermoflava	WP_027931217.1
	Pedobacter borealis	WP_083488722.1		Streptomyces sp. NRRL F-3213	WP_037811486.1
	Flavihumibacter solisilvae	WP_052272729.1		Kibdelosporangium sp. MJ126-NF4	WP_042178836.1
	Phocaeicola abscessus	WP_019207298.1		Amycolatopsis orientalis	WP_043828763.1
	Prevotella sp. 10(H)	WP_029905043.1		Acidobacteriaceae bacterium KBS 96	WP_020718354.1
	Haliscomenobacter hydrossis	WP_013767934.1		Timonella senegalensis	WP_019147440.1
	Petrimonas mucosa	SCM56177.1		Dyadobacter beijingensis	WP_019943653.1
	Rhodanobacter sp. OK091	WP_083572924.1		Glycomyces arizonensis	WP_051393195.1
	Paraglaciecola arctica	WP_007623913.1		Streptomyces sp. AA4	WP_009079104.1
	Janthinobacterium sp. HH01	WP_008447022.1		Amycolatopsis sp. M39	WP_067592678.1
	Phytophthora sojae	XP_009532401.1		Amycolatopsis taiwanensis	WP_027943448.1
	Luteibacter sp. UNCMF366Tsu5.1	SFW64242.1		Amycolatopsis methanolica	WP_017981571.1
	Rhodanobacter thiooxydans	WP_008433242.1		Amycolatopsis sp. ATCC 39116	WP_020422207.1
	Nitrospirillum amazonense	WP_004271373.1		Oerskovia turbata	WP_030151252.1
	Rhizopus microsporus	CEI98157.1		Amycolatopsis benzoatilytica	WP_020660079.1
	Lysobacter enzymogenes	WP_057945862.1		Acidobacteriaceae bacterium URHE0068	WP_081808920.1
	Lysobacter gummosus	WP_057941320.1		Amycolatopsis australiensis	WP_072478341.1
	Lysobacter sp. Root690	KRB05112.1		Micromonospora cremea	WP_074311079.1
	Pelomonas sp. Root1237	WP_056194047.1		Oerskovia enterophila	WP_068626237.1
	Lysobacter sp. Root667	WP_056099501.1		Cellulosimicrobium cellulans	WP_074803572.1
	Rhodanobacter sp. Root480	WP_056083220.1		Oerskovia sp. Root918	WP_056653051.1
	Rhodanobacter sp. Root627	WP_056606864.1		Oerskovia sp. Root22	WP_056764412.1
	Lysobacter capsici	ALN83655.1		Catelliglobosispora koreensis	WP_020521018.1
	Achlya hypogyna	AIG55834.1		Micromonospora avicenniae	SIR98257.1
	Lysobacter sp. Root916	WP_057164566.1		Cellulomonas sp. KRMCY2	WP_024287430.1
	Aphanomyces astaci	XP_009821620.1		Candidatus Solibacter usitatus	WP_011685707.1
	Lysobacter sp. Root604	WP_056181413.1		Kribbella flavida	WP_012922137.1
	Saprolegnia diclina VS20	XP_008612471.1		Cellulosimicrobium funkei	WP_047231113.1
	Pseudoxanthomonas sp. Root65	KRA55023.1		Cellulosimicrobium sp. I38E	WP_064315449.1
	Luteibacter rhizovicinus	WP_046967092.1		Cellulosimicrobium sp. MM	WP_051876671.1
	Lysobacter antibioticus	WP_082638914.1		Agreia sp. Leaf210	WP_055779930.1
	Lysobacter sp. Root983	WP_057159759.1		Promicromonospora sukumoe	WP_020014044.1
	Dyella japonica	WP_026634811.1		Cellulosimicrobium aquatile	WP_076404346.1
	Pseudoxanthomonas sp. Root630	KRA46944.1		Devosia sp. Root413D1	WP_055998533.1
	Luteimonas sp. FCS-9	WP_047136666.1		Agreia sp. Leaf335	WP_055856026.1
	Pseudoxanthomonas mexicana	WP_083537725.1		Devosia sp. Root105	WP_055876227.1
	Dyella jiangningensis	WP_038623401.1		Choanephora cucurbitarum	OBZ89227.1
				Parasitella parasitica	CEP19957.1
